# Supplementary material for: Structure-Function Relationships in PMA and PMAT Series Copolymers for Polymer Solar Cells
Source: MDPI journal article supplement (doi:10.3390/polym10040384), 2018-04-01
Supplement: s1 [file s1]

**Electronic Supplementary Information (ESI) for:**

**Structure-Function Relationships in PMA and PMAT Series  
Copolymers for Polymer Solar Cells**

Jhe-Han Chen, Chi-Kan Liu, Wei-Che Chang, Pai-Tao Sah, Li-Hsin Chan\*

Department of Applied Materials and Optoelectronic Engineering, National Chi Nan  
University, Nantou, Taiwan 54561, ROC.

\*To whom all correspondence should be addressed.

Chan\* is to be contacted at the Department of Applied Materials and Optoelectronic  
Engineering, National Chi Nan University, Nantou Taiwan 54561, ROC. Tel.:  
+886-49-2910960-4908.

E-mail addresses: [lhchan@ncnu.edu.tw](mailto:lhchan@ncnu.edu.tw) (L.-H. Chan)

## Supplementary Information

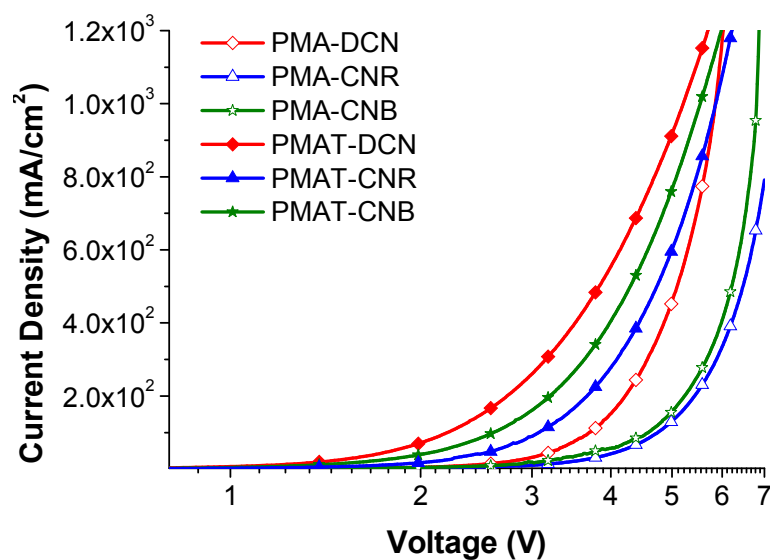

**Figure S1.** Space-charge-limited  $J$ - $V$  curves of hole-only devices based on copolymer/PC<sub>71</sub>BM blend films.

**Table S1.** Calculated hole mobilities of copolymer/PC<sub>71</sub>BM blend films.

| Copolymer/PC <sub>71</sub> BM (w/w = 1:2) | $\mu_{\text{SCLC,h}}$<br>(cm <sup>2</sup> V <sup>-1</sup> S <sup>-1</sup> ) |
|-------------------------------------------|-----------------------------------------------------------------------------|
| PMA-DCN                                   | $6.94 \times 10^{-5}$                                                       |
| PMA-CNR                                   | $2.15 \times 10^{-5}$                                                       |
| PMA-CNB                                   | $3.58 \times 10^{-5}$                                                       |
| PMAT-DCN                                  | $5.07 \times 10^{-4}$                                                       |
| PMAT-CNR                                  | $1.90 \times 10^{-4}$                                                       |
| PMAT-CNB                                  | $3.22 \times 10^{-4}$                                                       |
